# Supplementary material for: Introducing aldehyde functionality to proteins using ligand-directed affinity labeling
Source: Royal Society of Chemistry journal article supplement (doi:10.1039/d0cc01982h), 2020-01-01
Supplement: d0cc01982h1.xlsx [file d0cc01982h1.xlsx]

## Sheet: Sheet1
Protein ID	Protein score in experiment group	Protein score in control group
sp|O43570|CAH12_HUMANCarbonicanhydrase12OS=HomosapiensOX=9606GN=CA12PE=1SV=1	49.634	0
sp|P14923|PLAK_HUMANJunctionplakoglobinOS=HomosapiensOX=9606GN=JUPPE=1SV=3	38.172	13.967
sp|P15924|DESP_HUMANDesmoplakinOS=HomosapiensOX=9606GN=DSPPE=1SV=3	33.844	35.628
sp|P06733|ENOA_HUMANAlpha-enolaseOS=HomosapiensOX=9606GN=ENO1PE=1SV=2	30.056	12.013
sp|Q9BQE3|TBA1C_HUMANTubulinalpha-1CchainOS=HomosapiensOX=9606GN=TUBA1CPE=1SV=1;sp|Q71U36|TBA1A_HUMANTubulinalpha-1AchainOS=HomosapiensOX=9606GN=TUBA1APE=1SV=1;sp|P68363|TBA1B_HUMANTubulinalpha-1BchainOS=HomosapiensOX=9606GN=TUBA1BPE=1SV=1;sp|Q6PEY2|TBA3E_HUMANTubulinalpha-3EchainOS=HomosapiensOX=9606GN=TUBA3EPE=1SV=2;sp|P0DPH8|TBA3D_HUMANTubulinalpha-3DchainOS=HomosapiensOX=9606GN=TUBA3DPE=1SV=1…	27.265	0
sp|Q08554-2|DSC1_HUMANIsoform1BofDesmocollin-1OS=HomosapiensOX=9606GN=DSC1;sp|Q08554|DSC1_HUMANDesmocollin-1OS=HomosapiensOX=9606GN=DSC1PE=1SV=2	26.322	11.4
sp|P08865|RSSA_HUMAN40SribosomalproteinSAOS=HomosapiensOX=9606GN=RPSAPE=1SV=4	22.388	0
sp|P04075|ALDOA_HUMANFructose-bisphosphatealdolaseAOS=HomosapiensOX=9606GN=ALDOAPE=1SV=2	22.111	0
sp|P48741|HSP77_HUMANPutativeheatshock70kDaprotein7OS=HomosapiensOX=9606GN=HSPA7PE=5SV=2;sp|P17066|HSP76_HUMANHeatshock70kDaprotein6OS=HomosapiensOX=9606GN=HSPA6PE=1SV=2;sp|P54652|HSP72_HUMANHeatshock-related70kDaprotein2OS=HomosapiensOX=9606GN=HSPA2PE=1SV=1;sp|P34931|HS71L_HUMANHeatshock70kDaprotein1-likeOS=HomosapiensOX=9606GN=HSPA1LPE=1SV=2;sp|P0DMV9|HS71B_HUMANHeatshock70kDaprotein1BOS=Homosa…	16.034	0
sp|O75223|GGCT_HUMANGamma-glutamylcyclotransferaseOS=HomosapiensOX=9606GN=GGCTPE=1SV=1	15.286	5.802
sp|P81605|DCD_HUMANDermcidinOS=HomosapiensOX=9606GN=DCDPE=1SV=2	14.011	0
sp|P00338|LDHA_HUMANL-lactatedehydrogenaseAchainOS=HomosapiensOX=9606GN=LDHAPE=1SV=2;sp|Q6ZMR3|LDH6A_HUMANL-lactatedehydrogenaseA-like6AOS=HomosapiensOX=9606GN=LDHAL6APE=2SV=1;sp|P07864|LDHC_HUMANL-lactatedehydrogenaseCchainOS=HomosapiensOX=9606GN=LDHCPE=1SV=4;sp|P07195|LDHB_HUMANL-lactatedehydrogenaseBchainOS=HomosapiensOX=9606GN=LDHBPE=1SV=2	13.568	0
sp|Q5VTE0|EF1A3_HUMANPutativeelongationfactor1-alpha-like3OS=HomosapiensOX=9606GN=EEF1A1P5PE=5SV=1;sp|P68104|EF1A1_HUMANElongationfactor1-alpha1OS=HomosapiensOX=9606GN=EEF1A1PE=1SV=1;sp|Q05639|EF1A2_HUMANElongationfactor1-alpha2OS=HomosapiensOX=9606GN=EEF1A2PE=1SV=1	13.298	0
sp|P07205|PGK2_HUMANPhosphoglyceratekinase2OS=HomosapiensOX=9606GN=PGK2PE=1SV=3;sp|P00558|PGK1_HUMANPhosphoglyceratekinase1OS=HomosapiensOX=9606GN=PGK1PE=1SV=3	13.173	0
sp|P15328|FOLR1_HUMANFolatereceptoralphaOS=HomosapiensOX=9606GN=FOLR1PE=1SV=3	12.221	5.7016
sp|O76031|CLPX_HUMANATP-dependentClpproteaseATP-bindingsubunitclpX-like,mitochondrialOS=HomosapiensOX=9606GN=CLPXPE=1SV=2	11.283	0
sp|P25311|ZA2G_HUMANZinc-alpha-2-glycoproteinOS=HomosapiensOX=9606GN=AZGP1PE=1SV=2	9.2543	0
sp|P13804|ETFA_HUMANElectrontransferflavoproteinsubunitalpha,mitochondrialOS=HomosapiensOX=9606GN=ETFAPE=1SV=1	8.8361	6.5661
sp|Q99878|H2A1J_HUMANHistoneH2Atype1-JOS=HomosapiensOX=9606GN=HIST1H2AJPE=1SV=3;sp|Q96KK5|H2A1H_HUMANHistoneH2Atype1-HOS=HomosapiensOX=9606GN=HIST1H2AHPE=1SV=3;sp|Q71UI9|H2AV_HUMANHistoneH2A.VOS=HomosapiensOX=9606GN=H2AFVPE=1SV=3;sp|P0C0S5|H2AZ_HUMANHistoneH2A.ZOS=HomosapiensOX=9606GN=H2AFZPE=1SV=2;sp|Q9BTM1|H2AJ_HUMANHistoneH2A.JOS=HomosapiensOX=9606GN=H2AFJPE=1SV=1;sp|Q16777|H2A2C_HUMANHistoneH…	8.8049	0
sp|Q6NXT2|H3C_HUMANHistoneH3.3COS=HomosapiensOX=9606GN=H3F3CPE=1SV=3;sp|Q71DI3|H32_HUMANHistoneH3.2OS=HomosapiensOX=9606GN=HIST2H3APE=1SV=3;sp|Q16695|H31T_HUMANHistoneH3.1tOS=HomosapiensOX=9606GN=HIST3H3PE=1SV=3;sp|P84243|H33_HUMANHistoneH3.3OS=HomosapiensOX=9606GN=H3F3APE=1SV=2;sp|P68431|H31_HUMANHistoneH3.1OS=HomosapiensOX=9606GN=HIST1H3APE=1SV=2	8.5537	0
sp|P11142|HSP7C_HUMANHeatshockcognate71kDaproteinOS=HomosapiensOX=9606GN=HSPA8PE=1SV=1	8.5248	0
sp|Q99880|H2B1L_HUMANHistoneH2Btype1-LOS=HomosapiensOX=9606GN=HIST1H2BLPE=1SV=3;sp|Q99879|H2B1M_HUMANHistoneH2Btype1-MOS=HomosapiensOX=9606GN=HIST1H2BMPE=1SV=3;sp|Q99877|H2B1N_HUMANHistoneH2Btype1-NOS=HomosapiensOX=9606GN=HIST1H2BNPE=1SV=3;sp|Q93079|H2B1H_HUMANHistoneH2Btype1-HOS=HomosapiensOX=9606GN=HIST1H2BHPE=1SV=3;sp|Q8N257|H2B3B_HUMANHistoneH2Btype3-BOS=HomosapiensOX=9606GN=HIST3H2BBPE=1SV=3…	8.3443	0
sp|P00966|ASSY_HUMANArgininosuccinatesynthaseOS=HomosapiensOX=9606GN=ASS1PE=1SV=2	8.012	0
sp|P63244|RACK1_HUMANReceptorofactivatedproteinCkinase1OS=HomosapiensOX=9606GN=RACK1PE=1SV=3	7.4953	0
sp|Q13835|PKP1_HUMANPlakophilin-1OS=HomosapiensOX=9606GN=PKP1PE=1SV=2	7.1276	0
sp|Q9NZT1|CALL5_HUMANCalmodulin-likeprotein5OS=HomosapiensOX=9606GN=CALML5PE=1SV=2	6.9591	6.9869
sp|P67936|TPM4_HUMANTropomyosinalpha-4chainOS=HomosapiensOX=9606GN=TPM4PE=1SV=3;sp|P09493|TPM1_HUMANTropomyosinalpha-1chainOS=HomosapiensOX=9606GN=TPM1PE=1SV=2;sp|P07951|TPM2_HUMANTropomyosinbetachainOS=HomosapiensOX=9606GN=TPM2PE=1SV=1;CON__Q3SX28;sp|P06753|TPM3_HUMANTropomyosinalpha-3chainOS=HomosapiensOX=9606GN=TPM3PE=1SV=2	6.4259	0
sp|O60503|ADCY9_HUMANAdenylatecyclasetype9OS=HomosapiensOX=9606GN=ADCY9PE=1SV=4	6.3564	5.8734
sp|Q96NZ1|FOXN4_HUMANForkheadboxproteinN4OS=HomosapiensOX=9606GN=FOXN4PE=1SV=2;sp|O15353|FOXN1_HUMANForkheadboxproteinN1OS=HomosapiensOX=9606GN=FOXN1PE=1SV=1	6.3449	0
sp|Q86SJ6|DSG4_HUMANDesmoglein-4OS=HomosapiensOX=9606GN=DSG4PE=1SV=1	6.2949	0
sp|P63261|ACTG_HUMANActin,cytoplasmic2OS=HomosapiensOX=9606GN=ACTG1PE=1SV=1;sp|P60709|ACTB_HUMANActin,cytoplasmic1OS=HomosapiensOX=9606GN=ACTBPE=1SV=1;sp|Q9BYX7|ACTBM_HUMANPutativebeta-actin-likeprotein3OS=HomosapiensOX=9606GN=POTEKPPE=5SV=1;sp|P68133|ACTS_HUMANActin,alphaskeletalmuscleOS=HomosapiensOX=9606GN=ACTA1PE=1SV=1;sp|P68032|ACTC_HUMANActin,alphacardiacmuscle1OS=HomosapiensOX=9606GN=ACTC1…	0	17.862
sp|P11142|HSP7C_HUMANHeatshockcognate71kDaproteinOS=HomosapiensOX=9606GN=HSPA8PE=1SV=1;sp|P54652|HSP72_HUMANHeatshock-related70kDaprotein2OS=HomosapiensOX=9606GN=HSPA2PE=1SV=1	0	15.54
sp|Q96P63|SPB12_HUMANSerpinB12OS=HomosapiensOX=9606GN=SERPINB12PE=1SV=1	0	14.705
sp|Q06830|PRDX1_HUMANPeroxiredoxin-1OS=HomosapiensOX=9606GN=PRDX1PE=1SV=1;sp|P32119|PRDX2_HUMANPeroxiredoxin-2OS=HomosapiensOX=9606GN=PRDX2PE=1SV=5	0	13.258
sp|P62987|RL40_HUMANUbiquitin-60SribosomalproteinL40OS=HomosapiensOX=9606GN=UBA52PE=1SV=2;sp|P62979|RS27A_HUMANUbiquitin-40SribosomalproteinS27aOS=HomosapiensOX=9606GN=RPS27APE=1SV=2;sp|P0CG47|UBB_HUMANPolyubiquitin-BOS=HomosapiensOX=9606GN=UBBPE=1SV=1;sp|P0CG48|UBC_HUMANPolyubiquitin-COS=HomosapiensOX=9606GN=UBCPE=1SV=3	0	11.856
sp|P12273|PIP_HUMANProlactin-inducibleproteinOS=HomosapiensOX=9606GN=PIPPE=1SV=1	0	11.775
sp|Q6ZVX7|FBX50_HUMANF-boxonlyprotein50OS=HomosapiensOX=9606GN=NCCRP1PE=1SV=1	0	11.282
sp|Q99878|H2A1J_HUMANHistoneH2Atype1-JOS=HomosapiensOX=9606GN=HIST1H2AJPE=1SV=3;sp|Q96KK5|H2A1H_HUMANHistoneH2Atype1-HOS=HomosapiensOX=9606GN=HIST1H2AHPE=1SV=3;sp|Q71UI9|H2AV_HUMANHistoneH2A.VOS=HomosapiensOX=9606GN=H2AFVPE=1SV=3;sp|P0C0S5|H2AZ_HUMANHistoneH2A.ZOS=HomosapiensOX=9606GN=H2AFZPE=1SV=2;sp|Q9BTM1|H2AJ_HUMANHistoneH2A.JOS=HomosapiensOX=9606GN=H2AFJPE=1SV=1;sp|Q16777|H2A2C_HUMANHistoneH…	0	8.6729
sp|P51659|DHB4_HUMANPeroxisomalmultifunctionalenzymetype2OS=HomosapiensOX=9606GN=HSD17B4PE=1SV=3	0	7.7027
sp|Q01469|FABP5_HUMANFattyacid-bindingprotein5OS=HomosapiensOX=9606GN=FABP5PE=1SV=3	0	7.5369
sp|Q08554|DSC1_HUMANDesmocollin-1OS=HomosapiensOX=9606GN=DSC1PE=1SV=2	0	7.1372
sp|P06454|PTMA_HUMANProthymosinalphaOS=HomosapiensOX=9606GN=PTMAPE=1SV=2	0	7.099
sp|E5RJM6|ANR65_HUMANAnkyrinrepeatdomain-containingprotein65OS=HomosapiensOX=9606GN=ANKRD65PE=2SV=2	0	6.9946
sp|Q96QA5|GSDMA_HUMANGasdermin-AOS=HomosapiensOX=9606GN=GSDMAPE=1SV=4	0	6.5831
sp|P42702|LIFR_HUMANLeukemiainhibitoryfactorreceptorOS=HomosapiensOX=9606GN=LIFRPE=1SV=1	0	6.422
sp|Q5VTE0|EF1A3_HUMANPutativeelongationfactor1-alpha-like3OS=HomosapiensOX=9606GN=EEF1A1P5PE=5SV=1;sp|P68104|EF1A1_HUMANElongationfactor1-alpha1OS=HomosapiensOX=9606GN=EEF1A1PE=1SV=1;sp|Q05639|EF1A2_HUMANElongationfactor1-alpha2OS=HomosapiensOX=9606GN=EEF1A2PE=1SV=1	0	6.3385
sp|Q58WW2|DCAF6_HUMANDDB1-andCUL4-associatedfactor6OS=HomosapiensOX=9606GN=DCAF6PE=1SV=1	0	6.338
sp|Q04760|LGUL_HUMANLactoylglutathionelyaseOS=HomosapiensOX=9606GN=GLO1PE=1SV=4	0	6.2497
sp|P00338|LDHA_HUMANL-lactatedehydrogenaseAchainOS=HomosapiensOX=9606GN=LDHAPE=1SV=2	0	6.2468
sp|P61604|CH10_HUMAN10kDaheatshockprotein,mitochondrialOS=HomosapiensOX=9606GN=HSPE1PE=1SV=2	0	6.1844
sp|P08238|HS90B_HUMANHeatshockproteinHSP90-betaOS=HomosapiensOX=9606GN=HSP90AB1PE=1SV=4;sp|P07900|HS90A_HUMANHeatshockproteinHSP90-alphaOS=HomosapiensOX=9606GN=HSP90AA1PE=1SV=5	0	6.1177
sp|Q08188|TGM3_HUMANProtein-glutaminegamma-glutamyltransferaseEOS=HomosapiensOX=9606GN=TGM3PE=1SV=4	0	6.1117
sp|Q9Y490|TLN1_HUMANTalin-1OS=HomosapiensOX=9606GN=TLN1PE=1SV=3	0	6.0375
sp|Q8WYK0|ACO12_HUMANAcyl-coenzymeAthioesterase12OS=HomosapiensOX=9606GN=ACOT12PE=1SV=1	0	6.0238
sp|Q15517|CDSN_HUMANCorneodesmosinOS=HomosapiensOX=9606GN=CDSNPE=1SV=3	0	5.9971
sp|P04040|CATA_HUMANCatalaseOS=HomosapiensOX=9606GN=CATPE=1SV=3	0	5.9195
sp|P10599|THIO_HUMANThioredoxinOS=HomosapiensOX=9606GN=TXNPE=1SV=3	0	5.8577
sp|Q8IY18|SMC5_HUMANStructuralmaintenanceofchromosomesprotein5OS=HomosapiensOX=9606GN=SMC5PE=1SV=2	0	5.8575
sp|P62942|FKB1A_HUMANPeptidyl-prolylcis-transisomeraseFKBP1AOS=HomosapiensOX=9606GN=FKBP1APE=1SV=2	0	5.8551
sp|A0A1W2PR19|GSTT4_HUMANGlutathioneS-transferasetheta-4OS=HomosapiensOX=9606GN=GSTT4PE=3SV=1	0	5.8516
sp|P22914|CRYGS_HUMANGamma-crystallinSOS=HomosapiensOX=9606GN=CRYGSPE=1SV=4	0	5.7485
sp|Q5W064|LIPJ_HUMANLipasememberJOS=HomosapiensOX=9606GN=LIPJPE=2SV=3	0	5.7062
sp|P0DPE8|SM34B_HUMANSmallintegralmembraneprotein34BOS=HomosapiensOX=9606GN=SMIM34BPE=2SV=1;sp|A8MWV9|SM34A_HUMANSmallintegralmembraneprotein34AOS=HomosapiensOX=9606GN=SMIM34APE=2SV=1	0	5.7031
sp|P61626|LYSC_HUMANLysozymeCOS=HomosapiensOX=9606GN=LYZPE=1SV=1	0	5.6674
sp|P21980|TGM2_HUMANProtein-glutaminegamma-glutamyltransferase2OS=HomosapiensOX=9606GN=TGM2PE=1SV=2	0	5.666
sp|O75191|XYLB_HUMANXylulosekinaseOS=HomosapiensOX=9606GN=XYLBPE=1SV=3	0	5.6542
sp|Q13115|DUS4_HUMANDualspecificityproteinphosphatase4OS=HomosapiensOX=9606GN=DUSP4PE=1SV=1	0	5.6413
sp|Q8IUH5|ZDH17_HUMANPalmitoyltransferaseZDHHC17OS=HomosapiensOX=9606GN=ZDHHC17PE=1SV=2	0	5.6317
