# Supplementary material for: Introducing aldehyde functionality to proteins using ligand-directed affinity labeling
Source: Royal Society of Chemistry journal article supplement (doi:10.1039/d0cc01982h), 2020-01-01
Supplement: d0cc01982h2.xlsx [file d0cc01982h2.xlsx]

## Sheet: Sheet1
Protein ID	Protein score in cotrol gruop	Protein score in experiment group
sp|P15328|FOLR1_HUMANFolatereceptoralphaOS=HomosapiensOX=9606GN=FOLR1PE=1SV=3	0	62.465
sp|Q14574-2|DSC3_HUMANIsoform3BofDesmocollin-3OS=HomosapiensOX=9606GN=DSC3;sp|Q14574|DSC3_HUMANDesmocollin-3OS=HomosapiensOX=9606GN=DSC3PE=1SV=3	18.918	59.9
sp|Q08554-2|DSC1_HUMANIsoform1BofDesmocollin-1OS=HomosapiensOX=9606GN=DSC1;sp|Q08554|DSC1_HUMANDesmocollin-1OS=HomosapiensOX=9606GN=DSC1PE=1SV=2	20.986	55.664
sp|P04040|CATA_HUMANCatalaseOS=HomosapiensOX=9606GN=CATPE=1SV=3	12.902	43.661
sp|Q13835-2|PKP1_HUMANIsoform1ofPlakophilin-1OS=HomosapiensOX=9606GN=PKP1;sp|Q13835|PKP1_HUMANPlakophilin-1OS=HomosapiensOX=9606GN=PKP1PE=1SV=2	19.34	39.14
sp|P11142-2|HSP7C_HUMANIsoform2ofHeatshockcognate71kDaproteinOS=HomosapiensOX=9606GN=HSPA8;sp|P11142|HSP7C_HUMANHeatshockcognate71kDaproteinOS=HomosapiensOX=9606GN=HSPA8PE=1SV=1;tr|E9PN89|E9PN89_HUMANHeatshockcognate71kDaprotein(Fragment)OS=HomosapiensOX=9606GN=HSPA8PE=1SV=1;tr|E9PKE3|E9PKE3_HUMANHeatshockcognate71kDaproteinOS=HomosapiensOX=9606GN=HSPA8PE=1SV=1;tr|E9PI65|E9PI65_HUMANHeatshockcogn…	0	37.325
sp|P42357-2|HUTH_HUMANIsoform2ofHistidineammonia-lyaseOS=HomosapiensOX=9606GN=HAL;sp|P42357|HUTH_HUMANHistidineammonia-lyaseOS=HomosapiensOX=9606GN=HALPE=1SV=1;tr|F8W0V1|F8W0V1_HUMANHistidineammonia-lyase(Fragment)OS=HomosapiensOX=9606GN=HALPE=1SV=1;tr|F8VNX0|F8VNX0_HUMANHistidineammonia-lyase(Fragment)OS=HomosapiensOX=9606GN=HALPE=1SV=1;tr|Q4VB95|Q4VB95_HUMANHALproteinOS=HomosapiensOX=9606GN=HAL…	0	35.254
sp|Q5T749|KPRP_HUMANKeratinocyteproline-richproteinOS=HomosapiensOX=9606GN=KPRPPE=1SV=1	5.7167	34.75
sp|P68366-2|TBA4A_HUMANIsoform2ofTubulinalpha-4AchainOS=HomosapiensOX=9606GN=TUBA4A;sp|P68366|TBA4A_HUMANTubulinalpha-4AchainOS=HomosapiensOX=9606GN=TUBA4APE=1SV=1;sp|Q71U36-2|TBA1A_HUMANIsoform2ofTubulinalpha-1AchainOS=HomosapiensOX=9606GN=TUBA1A;sp|Q9BQE3|TBA1C_HUMANTubulinalpha-1CchainOS=HomosapiensOX=9606GN=TUBA1CPE=1SV=1;sp|Q71U36|TBA1A_HUMANTubulinalpha-1AchainOS=HomosapiensOX=9606GN=TUBA1A…	0	34.744
sp|P63104|1433Z_HUMAN14-3-3proteinzeta/deltaOS=HomosapiensOX=9606GN=YWHAZPE=1SV=1;tr|E5RGE1|E5RGE1_HUMAN14-3-3proteinzeta/delta(Fragment)OS=HomosapiensOX=9606GN=YWHAZPE=1SV=8;tr|Q4VY20|Q4VY20_HUMAN14-3-3proteinbeta/alpha(Fragment)OS=HomosapiensOX=9606GN=YWHABPE=1SV=1;tr|E5RIR4|E5RIR4_HUMAN14-3-3proteinzeta/delta(Fragment)OS=HomosapiensOX=9606GN=YWHAZPE=1SV=1;tr|A0A0J9YWZ2|A0A0J9YWZ2_HUMAN14-3-3pr…	0	34.361
sp|P69905|HBA_HUMANHemoglobinsubunitalphaOS=HomosapiensOX=9606GN=HBA1PE=1SV=2;tr|G3V1N2|G3V1N2_HUMANHCG1745306,isoformCRA_aOS=HomosapiensOX=9606GN=HBA2PE=1SV=1;tr|A0A2R8Y7C0|A0A2R8Y7C0_HUMANHemoglobinsubunitalpha(Fragment)OS=HomosapiensOX=9606GN=HBA2PE=1SV=1	0	31.695
sp|P25311|ZA2G_HUMANZinc-alpha-2-glycoproteinOS=HomosapiensOX=9606GN=AZGP1PE=1SV=2;tr|C9JEV0|C9JEV0_HUMANZinc-alpha-2-glycoproteinOS=HomosapiensOX=9606GN=AZGP1PE=1SV=1	18.894	30.719
sp|P29508|SPB3_HUMANSerpinB3OS=HomosapiensOX=9606GN=SERPINB3PE=1SV=2;sp|P29508-2|SPB3_HUMANIsoform2ofSerpinB3OS=HomosapiensOX=9606GN=SERPINB3;sp|P48594|SPB4_HUMANSerpinB4OS=HomosapiensOX=9606GN=SERPINB4PE=1SV=2;tr|C9JZ65|C9JZ65_HUMANSerpinB4(Fragment)OS=HomosapiensOX=9606GN=SERPINB4PE=1SV=1;tr|H0Y5H9|H0Y5H9_HUMANSerpinB4(Fragment)OS=HomosapiensOX=9606GN=SERPINB4PE=1SV=1	0	28.374
sp|P47929|LEG7_HUMANGalectin-7OS=HomosapiensOX=9606GN=LGALS7PE=1SV=2	0	26.186
sp|Q5JNZ5|RS26L_HUMANPutative40SribosomalproteinS26-like1OS=HomosapiensOX=9606GN=RPS26P11PE=5SV=1;sp|P62854|RS26_HUMAN40SribosomalproteinS26OS=HomosapiensOX=9606GN=RPS26PE=1SV=3	0	21.537
sp|A8K2U0|A2ML1_HUMANAlpha-2-macroglobulin-likeprotein1OS=HomosapiensOX=9606GN=A2ML1PE=1SV=3;tr|F5GXP1|F5GXP1_HUMANAlpha-2-macroglobulin-likeprotein1(Fragment)OS=HomosapiensOX=9606GN=A2ML1PE=1SV=1;sp|A8K2U0-2|A2ML1_HUMANIsoform2ofAlpha-2-macroglobulin-likeprotein1OS=HomosapiensOX=9606GN=A2ML1;tr|H0YGG5|H0YGG5_HUMANAlpha-2-macroglobulin-likeprotein1(Fragment)OS=HomosapiensOX=9606GN=A2ML1PE=1SV=1	0	19.127
sp|P06702|S10A9_HUMANProteinS100-A9OS=HomosapiensOX=9606GN=S100A9PE=1SV=1	0	17.573
sp|P08238|HS90B_HUMANHeatshockproteinHSP90-betaOS=HomosapiensOX=9606GN=HSP90AB1PE=1SV=4;sp|Q14568|HS902_HUMANHeatshockproteinHSP90-alphaA2OS=HomosapiensOX=9606GN=HSP90AA2PPE=1SV=2;sp|Q58FF8|H90B2_HUMANPutativeheatshockproteinHSP90-beta2OS=HomosapiensOX=9606GN=HSP90AB2PPE=1SV=2;sp|Q58FG1|HS904_HUMANPutativeheatshockproteinHSP90-alphaA4OS=HomosapiensOX=9606GN=HSP90AA4PPE=5SV=1;sp|Q58FF7|H90B3_HUMAN…	0	16.697
sp|Q9NZT1|CALL5_HUMANCalmodulin-likeprotein5OS=HomosapiensOX=9606GN=CALML5PE=1SV=2	12.67	16.652
sp|P06733-2|ENOA_HUMANIsoformMBP-1ofAlpha-enolaseOS=HomosapiensOX=9606GN=ENO1;tr|A0A2R8Y6G6|A0A2R8Y6G6_HUMANAlpha-enolaseOS=HomosapiensOX=9606GN=ENO1PE=1SV=1;sp|P06733|ENOA_HUMANAlpha-enolaseOS=HomosapiensOX=9606GN=ENO1PE=1SV=2;tr|K7EM90|K7EM90_HUMANAlpha-enolase(Fragment)OS=HomosapiensOX=9606GN=ENO1PE=1SV=1	0	16.352
sp|P48668|K2C6C_HUMANKeratin,typeIIcytoskeletal6COS=HomosapiensOX=9606GN=KRT6CPE=1SV=3;CON__P48668	0	15.584
sp|P10599|THIO_HUMANThioredoxinOS=HomosapiensOX=9606GN=TXNPE=1SV=3;sp|P10599-2|THIO_HUMANIsoform2ofThioredoxinOS=HomosapiensOX=9606GN=TXN	0	14.863
sp|P22735|TGM1_HUMANProtein-glutaminegamma-glutamyltransferaseKOS=HomosapiensOX=9606GN=TGM1PE=1SV=4;sp|P22735-2|TGM1_HUMANIsoform2ofProtein-glutaminegamma-glutamyltransferaseKOS=HomosapiensOX=9606GN=TGM1	11.759	14.761
sp|Q16610-2|ECM1_HUMANIsoform2ofExtracellularmatrixprotein1OS=HomosapiensOX=9606GN=ECM1;sp|Q16610|ECM1_HUMANExtracellularmatrixprotein1OS=HomosapiensOX=9606GN=ECM1PE=1SV=2;sp|Q16610-4|ECM1_HUMANIsoform4ofExtracellularmatrixprotein1OS=HomosapiensOX=9606GN=ECM1;sp|Q16610-3|ECM1_HUMANIsoform3ofExtracellularmatrixprotein1OS=HomosapiensOX=9606GN=ECM1	0	13.946
sp|P12273|PIP_HUMANProlactin-inducibleproteinOS=HomosapiensOX=9606GN=PIPPE=1SV=1	0	13.865
sp|P62805|H4_HUMANHistoneH4OS=HomosapiensOX=9606GN=H4C1PE=1SV=2	15.294	12.978
sp|Q8WVV4|POF1B_HUMANProteinPOF1BOS=HomosapiensOX=9606GN=POF1BPE=1SV=3;sp|Q8WVV4-1|POF1B_HUMANIsoform1ofProteinPOF1BOS=HomosapiensOX=9606GN=POF1B	0	12.869
sp|P31151|S10A7_HUMANProteinS100-A7OS=HomosapiensOX=9606GN=S100A7PE=1SV=4;sp|Q86SG5|S1A7A_HUMANProteinS100-A7AOS=HomosapiensOX=9606GN=S100A7APE=1SV=3	0	12.279
sp|P05109|S10A8_HUMANProteinS100-A8OS=HomosapiensOX=9606GN=S100A8PE=1SV=1	9.9201	11.489
sp|Q9H1E1|RNAS7_HUMANRibonuclease7OS=HomosapiensOX=9606GN=RNASE7PE=1SV=2	0	9.8245
sp|P04083|ANXA1_HUMANAnnexinA1OS=HomosapiensOX=9606GN=ANXA1PE=1SV=2	0	9.2057
sp|P32119|PRDX2_HUMANPeroxiredoxin-2OS=HomosapiensOX=9606GN=PRDX2PE=1SV=5	0	8.8571
sp|Q7RTS7|K2C74_HUMANKeratin,typeIIcytoskeletal74OS=HomosapiensOX=9606GN=KRT74PE=1SV=2;CON__Q7RTS7;sp|Q86Y46|K2C73_HUMANKeratin,typeIIcytoskeletal73OS=HomosapiensOX=9606GN=KRT73PE=1SV=1;CON__Q32MB2;tr|F8W1S1|F8W1S1_HUMANKeratin,typeIIcytoskeletal74OS=HomosapiensOX=9606GN=KRT74PE=1SV=1;sp|Q86Y46-2|K2C73_HUMANIsoform2ofKeratin,typeIIcytoskeletal73OS=HomosapiensOX=9606GN=KRT73;sp|Q3SY84|K2C71_HUMANK…	0	8.7599
sp|P13716|HEM2_HUMANDelta-aminolevulinicaciddehydrataseOS=HomosapiensOX=9606GN=ALADPE=1SV=1;sp|P13716-2|HEM2_HUMANIsoform2ofDelta-aminolevulinicaciddehydrataseOS=HomosapiensOX=9606GN=ALAD	9.0163	8.0709
sp|P11021|BIP_HUMANEndoplasmicreticulumchaperoneBiPOS=HomosapiensOX=9606GN=HSPA5PE=1SV=2	32.45	8.0346
sp|P68133|ACTS_HUMANActin,alphaskeletalmuscleOS=HomosapiensOX=9606GN=ACTA1PE=1SV=1;sp|P68032|ACTC_HUMANActin,alphacardiacmuscle1OS=HomosapiensOX=9606GN=ACTC1PE=1SV=1;sp|P63267|ACTH_HUMANActin,gamma-entericsmoothmuscleOS=HomosapiensOX=9606GN=ACTG2PE=1SV=1;sp|P62736|ACTA_HUMANActin,aorticsmoothmuscleOS=HomosapiensOX=9606GN=ACTA2PE=1SV=1;tr|A6NL76|A6NL76_HUMANActin,alphaskeletalmuscleOS=HomosapiensO…	0	7.471
sp|A0A1W2PP97|THSD8_HUMANThrombospondintype-1domain-containingprotein8OS=HomosapiensOX=9606GN=THSD8PE=3SV=2	0	7.0102
sp|Q5T750|XP32_HUMANSkin-specificprotein32OS=HomosapiensOX=9606GN=XP32PE=1SV=1	6.0576	6.9712
sp|P62273|RS29_HUMAN40SribosomalproteinS29OS=HomosapiensOX=9606GN=RPS29PE=1SV=2;sp|P62273-2|RS29_HUMANIsoform2of40SribosomalproteinS29OS=HomosapiensOX=9606GN=RPS29;tr|A0A2R8Y851|A0A2R8Y851_HUMAN40SribosomalproteinS29OS=HomosapiensOX=9606GN=RPS29PE=1SV=1	0	6.8587
sp|Q5VSP4|LC1L1_HUMANPutativelipocalin1-likeprotein1OS=HomosapiensOX=9606GN=LCN1P1PE=5SV=1;sp|P31025|LCN1_HUMANLipocalin-1OS=HomosapiensOX=9606GN=LCN1PE=1SV=1	9.0672	6.5375
sp|O14818-2|PSA7_HUMANIsoform2ofProteasomesubunitalphatype-7OS=HomosapiensOX=9606GN=PSMA7;sp|Q8TAA3-2|PSMA8_HUMANIsoform2ofProteasomesubunitalpha-type8OS=HomosapiensOX=9606GN=PSMA8;tr|A0A087WYS6|A0A087WYS6_HUMANProteasomeendopeptidasecomplexOS=HomosapiensOX=9606GN=PSMA8PE=1SV=1;sp|O14818|PSA7_HUMANProteasomesubunitalphatype-7OS=HomosapiensOX=9606GN=PSMA7PE=1SV=1;sp|Q8TAA3-5|PSMA8_HUMANIsoform3ofP…	0	6.4574
sp|P00918|CAH2_HUMANCarbonicanhydrase2OS=HomosapiensOX=9606GN=CA2PE=1SV=2	7.3383	6.4553
sp|Q8IVV2|LOXH1_HUMANLipoxygenasehomologydomain-containingprotein1OS=HomosapiensOX=9606GN=LOXHD1PE=2SV=4;tr|F5GZB4|F5GZB4_HUMANLipoxygenasehomologydomain-containingprotein1OS=HomosapiensOX=9606GN=LOXHD1PE=1SV=1;tr|A0A2R8Y7K4|A0A2R8Y7K4_HUMANLipoxygenasehomologydomain-containingprotein1OS=HomosapiensOX=9606GN=LOXHD1PE=1SV=1	0	6.3586
sp|P20930|FILA_HUMANFilaggrinOS=HomosapiensOX=9606GN=FLGPE=1SV=3;CON__P20930	6.968	6.3021
sp|P48741|HSP77_HUMANPutativeheatshock70kDaprotein7OS=HomosapiensOX=9606GN=HSPA7PE=5SV=2;sp|P17066|HSP76_HUMANHeatshock70kDaprotein6OS=HomosapiensOX=9606GN=HSPA6PE=1SV=2;tr|E9PN25|E9PN25_HUMANHeatshockcognate71kDaprotein(Fragment)OS=HomosapiensOX=9606GN=HSPA8PE=1SV=1;tr|E9PPY6|E9PPY6_HUMANHeatshockcognate71kDaprotein(Fragment)OS=HomosapiensOX=9606GN=HSPA8PE=1SV=1;sp|P0DMV8-2|HS71A_HUMANIsoform2of…	0	6.2259
sp|P35908|K22E_HUMANKeratin,typeIIcytoskeletal2epidermalOS=HomosapiensOX=9606GN=KRT2PE=1SV=2	7.5863	6.1795
sp|Q6ZVX7|FBX50_HUMANF-boxonlyprotein50OS=HomosapiensOX=9606GN=NCCRP1PE=1SV=1	0	6.0748
sp|O60678-2|ANM3_HUMANIsoform2ofProteinarginineN-methyltransferase3OS=HomosapiensOX=9606GN=PRMT3;sp|O60678|ANM3_HUMANProteinarginineN-methyltransferase3OS=HomosapiensOX=9606GN=PRMT3PE=1SV=4	0	6.0438
sp|Q9Y6R9|CCD61_HUMANCoiled-coildomain-containingprotein61OS=HomosapiensOX=9606GN=CCDC61PE=1SV=3	0	5.8126
sp|Q96N64|PWP2A_HUMANPWWPdomain-containingprotein2AOS=HomosapiensOX=9606GN=PWWP2APE=1SV=2	0	5.8044
sp|Q15828|CYTM_HUMANCystatin-MOS=HomosapiensOX=9606GN=CST6PE=1SV=1	0	5.7252
sp|P21980-2|TGM2_HUMANIsoform2ofProtein-glutaminegamma-glutamyltransferase2OS=HomosapiensOX=9606GN=TGM2;sp|P21980|TGM2_HUMANProtein-glutaminegamma-glutamyltransferase2OS=HomosapiensOX=9606GN=TGM2PE=1SV=2	5.7674	5.7153
sp|P60174-1|TPIS_HUMANIsoform2ofTriosephosphateisomeraseOS=HomosapiensOX=9606GN=TPI1;sp|P60174|TPIS_HUMANTriosephosphateisomeraseOS=HomosapiensOX=9606GN=TPI1PE=1SV=3	0	5.6713
sp|Q9BXT5|TEX15_HUMANTestis-expressedprotein15OS=HomosapiensOX=9606GN=TEX15PE=1SV=2;tr|A0A2R8Y358|A0A2R8Y358_HUMANTestis-expressedprotein15OS=HomosapiensOX=9606GN=TEX15PE=4SV=1;tr|A0A1W2PS94|A0A1W2PS94_HUMANTestis-expressedprotein15OS=HomosapiensOX=9606GN=TEX15PE=4SV=1	0	5.6099
sp|P19012|K1C15_HUMANKeratin,typeIcytoskeletal15OS=HomosapiensOX=9606GN=KRT15PE=1SV=3;CON__P19012;CON__A2A4G1;sp|P19012-2|K1C15_HUMANIsoform2ofKeratin,typeIcytoskeletal15OS=HomosapiensOX=9606GN=KRT15;tr|A8MT21|A8MT21_HUMANKeratin,typeIcytoskeletal15OS=HomosapiensOX=9606GN=KRT15PE=1SV=1;tr|A0A3B3ITG2|A0A3B3ITG2_HUMANKeratin,typeIcytoskeletal12(Fragment)OS=HomosapiensOX=9606GN=KRT12PE=1SV=1;tr|C9JT…	0	5.5495
sp|P42702|LIFR_HUMANLeukemiainhibitoryfactorreceptorOS=HomosapiensOX=9606GN=LIFRPE=1SV=1	5.7277	5.5484
sp|P49815-7|TSC2_HUMANIsoform7ofTuberinOS=HomosapiensOX=9606GN=TSC2;sp|P49815-6|TSC2_HUMANIsoform6ofTuberinOS=HomosapiensOX=9606GN=TSC2;tr|A0A2R8Y5F1|A0A2R8Y5F1_HUMANTuberinOS=HomosapiensOX=9606GN=TSC2PE=1SV=1;tr|A0A2R8YGU4|A0A2R8YGU4_HUMANTuberinOS=HomosapiensOX=9606GN=TSC2PE=1SV=1;sp|P49815-5|TSC2_HUMANIsoform5ofTuberinOS=HomosapiensOX=9606GN=TSC2;tr|X5D2U8|X5D2U8_HUMANTuberin(Fragment)OS=Homos…	0	5.5465
sp|P17900|SAP3_HUMANGangliosideGM2activatorOS=HomosapiensOX=9606GN=GM2APE=1SV=4	0	5.5382
sp|Q08378-4|GOGA3_HUMANIsoform3ofGolginsubfamilyAmember3OS=HomosapiensOX=9606GN=GOLGA3;sp|Q08378-2|GOGA3_HUMANIsoform2ofGolginsubfamilyAmember3OS=HomosapiensOX=9606GN=GOLGA3;sp|Q08378|GOGA3_HUMANGolginsubfamilyAmember3OS=HomosapiensOX=9606GN=GOLGA3PE=1SV=2	0	5.5323
sp|P20618|PSB1_HUMANProteasomesubunitbetatype-1OS=HomosapiensOX=9606GN=PSMB1PE=1SV=2	0	5.5306
sp|Q02413|DSG1_HUMANDesmoglein-1OS=HomosapiensOX=9606GN=DSG1PE=1SV=2;sp|Q02413-2|DSG1_HUMANIsoform2ofDesmoglein-1OS=HomosapiensOX=9606GN=DSG1	58.049	0
sp|P07900|HS90A_HUMANHeatshockproteinHSP90-alphaOS=HomosapiensOX=9606GN=HSP90AA1PE=1SV=5;sp|P07900-2|HS90A_HUMANIsoform2ofHeatshockproteinHSP90-alphaOS=HomosapiensOX=9606GN=HSP90AA1;tr|G3V2J8|G3V2J8_HUMANHeatshockproteinHSP90-alpha(Fragment)OS=HomosapiensOX=9606GN=HSP90AA1PE=1SV=1	53.978	0
sp|Q5VTE0|EF1A3_HUMANPutativeelongationfactor1-alpha-like3OS=HomosapiensOX=9606GN=EEF1A1P5PE=5SV=1;sp|P68104|EF1A1_HUMANElongationfactor1-alpha1OS=HomosapiensOX=9606GN=EEF1A1PE=1SV=1;sp|Q05639|EF1A2_HUMANElongationfactor1-alpha2OS=HomosapiensOX=9606GN=EEF1A2PE=1SV=1;tr|A0A2U3TZH3|A0A2U3TZH3_HUMANElongationfactor1-alphaOS=HomosapiensOX=9606GN=EEF1A2PE=1SV=1;tr|A0A087WV01|A0A087WV01_HUMANElongation…	53.423	0
sp|P62851|RS25_HUMAN40SribosomalproteinS25OS=HomosapiensOX=9606GN=RPS25PE=1SV=1	49.113	0
sp|Q5D862|FILA2_HUMANFilaggrin-2OS=HomosapiensOX=9606GN=FLG2PE=1SV=1;CON__Q5D862	48.748	0
sp|P62937|PPIA_HUMANPeptidyl-prolylcis-transisomeraseAOS=HomosapiensOX=9606GN=PPIAPE=1SV=2;sp|P62937-2|PPIA_HUMANIsoform2ofPeptidyl-prolylcis-transisomeraseAOS=HomosapiensOX=9606GN=PPIA;tr|F8WE65|F8WE65_HUMANPeptidyl-prolylcis-transisomeraseOS=HomosapiensOX=9606GN=PPIAPE=1SV=1;tr|C9J5S7|C9J5S7_HUMANPeptidyl-prolylcis-transisomeraseOS=HomosapiensOX=9606GN=PPIAPE=1SV=1	48.06	0
sp|Q71U36-2|TBA1A_HUMANIsoform2ofTubulinalpha-1AchainOS=HomosapiensOX=9606GN=TUBA1A;sp|Q71U36|TBA1A_HUMANTubulinalpha-1AchainOS=HomosapiensOX=9606GN=TUBA1APE=1SV=1;sp|P68363|TBA1B_HUMANTubulinalpha-1BchainOS=HomosapiensOX=9606GN=TUBA1BPE=1SV=1;sp|Q9BQE3|TBA1C_HUMANTubulinalpha-1CchainOS=HomosapiensOX=9606GN=TUBA1CPE=1SV=1;tr|F5H5D3|F5H5D3_HUMANTubulinalphachainOS=HomosapiensOX=9606GN=TUBA1CPE=1SV…	47.408	0
sp|P50991-2|TCPD_HUMANIsoform2ofT-complexprotein1subunitdeltaOS=HomosapiensOX=9606GN=CCT4;sp|P50991|TCPD_HUMANT-complexprotein1subunitdeltaOS=HomosapiensOX=9606GN=CCT4PE=1SV=4	46.445	0
sp|Q13838|DX39B_HUMANSpliceosomeRNAhelicaseDDX39BOS=HomosapiensOX=9606GN=DDX39BPE=1SV=1;sp|Q13838-2|DX39B_HUMANIsoform2ofSpliceosomeRNAhelicaseDDX39BOS=HomosapiensOX=9606GN=DDX39B;tr|A0A0G2JJZ9|A0A0G2JJZ9_HUMANSpliceosomeRNAhelicaseDDX39B(Fragment)OS=HomosapiensOX=9606GN=DDX39BPE=1SV=1;tr|Q5STU3|Q5STU3_HUMANSpliceosomeRNAhelicaseDDX39BOS=HomosapiensOX=9606GN=DDX39BPE=1SV=2;sp|O00148|DX39A_HUMANAT…	43.488	0
sp|P36578|RL4_HUMAN60SribosomalproteinL4OS=HomosapiensOX=9606GN=RPL4PE=1SV=5;tr|H3BM89|H3BM89_HUMAN60SribosomalproteinL4OS=HomosapiensOX=9606GN=RPL4PE=1SV=1;tr|H3BTP7|H3BTP7_HUMAN60SribosomalproteinL4(Fragment)OS=HomosapiensOX=9606GN=RPL4PE=1SV=1;tr|H3BU31|H3BU31_HUMAN60SribosomalproteinL4(Fragment)OS=HomosapiensOX=9606GN=RPL4PE=1SV=1	42.569	0
sp|Q9UQ80-2|PA2G4_HUMANIsoform2ofProliferation-associatedprotein2G4OS=HomosapiensOX=9606GN=PA2G4;sp|Q9UQ80|PA2G4_HUMANProliferation-associatedprotein2G4OS=HomosapiensOX=9606GN=PA2G4PE=1SV=3;tr|H0YIN7|H0YIN7_HUMANPeptidase_M24domain-containingprotein(Fragment)OS=HomosapiensOX=9606PE=1SV=3;tr|F8W0A3|F8W0A3_HUMANProliferation-associatedprotein2G4(Fragment)OS=HomosapiensOX=9606GN=PA2G4PE=1SV=1;tr|F8V…	42.386	0
sp|Q8N1N4-2|K2C78_HUMANIsoform2ofKeratin,typeIIcytoskeletal78OS=HomosapiensOX=9606GN=KRT78;sp|Q8N1N4|K2C78_HUMANKeratin,typeIIcytoskeletal78OS=HomosapiensOX=9606GN=KRT78PE=1SV=2;CON__Q8N1N4-2;CON__Q7RTT2	39.506	0
sp|P55072|TERA_HUMANTransitionalendoplasmicreticulumATPaseOS=HomosapiensOX=9606GN=VCPPE=1SV=4;tr|C9JUP7|C9JUP7_HUMANTransitionalendoplasmicreticulumATPase(Fragment)OS=HomosapiensOX=9606GN=VCPPE=1SV=1;tr|C9IZA5|C9IZA5_HUMANTransitionalendoplasmicreticulumATPase(Fragment)OS=HomosapiensOX=9606GN=VCPPE=1SV=1	37.616	0
sp|P04075|ALDOA_HUMANFructose-bisphosphatealdolaseAOS=HomosapiensOX=9606GN=ALDOAPE=1SV=2;tr|J3KPS3|J3KPS3_HUMANFructose-bisphosphatealdolaseOS=HomosapiensOX=9606GN=ALDOAPE=1SV=1;sp|P04075-2|ALDOA_HUMANIsoform2ofFructose-bisphosphatealdolaseAOS=HomosapiensOX=9606GN=ALDOA;tr|H3BPS8|H3BPS8_HUMANFructose-bisphosphatealdolaseA(Fragment)OS=HomosapiensOX=9606GN=ALDOAPE=1SV=1;tr|H3BQN4|H3BQN4_HUMANFructo…	37.587	0
sp|P23396|RS3_HUMAN40SribosomalproteinS3OS=HomosapiensOX=9606GN=RPS3PE=1SV=2;sp|P23396-2|RS3_HUMANIsoform2of40SribosomalproteinS3OS=HomosapiensOX=9606GN=RPS3;tr|F2Z2S8|F2Z2S8_HUMAN40SribosomalproteinS3OS=HomosapiensOX=9606GN=RPS3PE=1SV=1;tr|H0YF32|H0YF32_HUMAN40SribosomalproteinS3(Fragment)OS=HomosapiensOX=9606GN=RPS3PE=1SV=1;tr|H0YCJ7|H0YCJ7_HUMAN40SribosomalproteinS3(Fragment)OS=HomosapiensOX=9…	36.685	0
sp|P62701|RS4X_HUMAN40SribosomalproteinS4,XisoformOS=HomosapiensOX=9606GN=RPS4XPE=1SV=2;tr|C9JEH7|C9JEH7_HUMAN40SribosomalproteinS4,Yisoform1(Fragment)OS=HomosapiensOX=9606GN=RPS4Y1PE=1SV=1;sp|P22090|RS4Y1_HUMAN40SribosomalproteinS4,Yisoform1OS=HomosapiensOX=9606GN=RPS4Y1PE=1SV=2;sp|Q8TD47|RS4Y2_HUMAN40SribosomalproteinS4,Yisoform2OS=HomosapiensOX=9606GN=RPS4Y2PE=2SV=3	35.144	0
sp|P22626-2|ROA2_HUMANIsoformA2ofHeterogeneousnuclearribonucleoproteinsA2/B1OS=HomosapiensOX=9606GN=HNRNPA2B1;sp|P22626|ROA2_HUMANHeterogeneousnuclearribonucleoproteinsA2/B1OS=HomosapiensOX=9606GN=HNRNPA2B1PE=1SV=2;tr|A0A087WUI2|A0A087WUI2_HUMANHeterogeneousnuclearribonucleoproteinsA2/B1OS=HomosapiensOX=9606GN=HNRNPA2B1PE=1SV=1	35.109	0
sp|P50990-2|TCPQ_HUMANIsoform2ofT-complexprotein1subunitthetaOS=HomosapiensOX=9606GN=CCT8;sp|P50990|TCPQ_HUMANT-complexprotein1subunitthetaOS=HomosapiensOX=9606GN=CCT8PE=1SV=4;sp|P50990-3|TCPQ_HUMANIsoform3ofT-complexprotein1subunitthetaOS=HomosapiensOX=9606GN=CCT8;tr|H7C4C8|H7C4C8_HUMANT-complexprotein1subunittheta(Fragment)OS=HomosapiensOX=9606GN=CCT8PE=1SV=1	32.374	0
sp|P60842|IF4A1_HUMANEukaryoticinitiationfactor4A-IOS=HomosapiensOX=9606GN=EIF4A1PE=1SV=1;tr|J3KTB5|J3KTB5_HUMANEukaryoticinitiationfactor4A-I(Fragment)OS=HomosapiensOX=9606GN=EIF4A1PE=1SV=1;tr|J3QS69|J3QS69_HUMANEukaryoticinitiationfactor4A-I(Fragment)OS=HomosapiensOX=9606GN=EIF4A1PE=1SV=1;tr|J3KT12|J3KT12_HUMANEukaryoticinitiationfactor4A-IOS=HomosapiensOX=9606GN=EIF4A1PE=1SV=1;sp|P60842-2|IF4A…	30.725	0
sp|P48643-2|TCPE_HUMANIsoform2ofT-complexprotein1subunitepsilonOS=HomosapiensOX=9606GN=CCT5;tr|E7ENZ3|E7ENZ3_HUMANT-complexprotein1subunitepsilonOS=HomosapiensOX=9606GN=CCT5PE=1SV=1;tr|B7ZAR1|B7ZAR1_HUMANT-complexprotein1subunitepsilonOS=HomosapiensOX=9606GN=CCT5PE=1SV=1;tr|E9PCA1|E9PCA1_HUMANT-complexprotein1subunitepsilonOS=HomosapiensOX=9606GN=CCT5PE=1SV=1;sp|P48643|TCPE_HUMANT-complexprotein1…	29.146	0
sp|P00338|LDHA_HUMANL-lactatedehydrogenaseAchainOS=HomosapiensOX=9606GN=LDHAPE=1SV=2;sp|P00338-3|LDHA_HUMANIsoform3ofL-lactatedehydrogenaseAchainOS=HomosapiensOX=9606GN=LDHA;sp|P00338-5|LDHA_HUMANIsoform5ofL-lactatedehydrogenaseAchainOS=HomosapiensOX=9606GN=LDHA;sp|P00338-4|LDHA_HUMANIsoform4ofL-lactatedehydrogenaseAchainOS=HomosapiensOX=9606GN=LDHA;sp|P00338-2|LDHA_HUMANIsoform2ofL-lactatedehydr…	28.486	0
sp|P39019|RS19_HUMAN40SribosomalproteinS19OS=HomosapiensOX=9606GN=RPS19PE=1SV=2;tr|M0R2L9|M0R2L9_HUMAN40SribosomalproteinS19(Fragment)OS=HomosapiensOX=9606GN=RPS19PE=1SV=1;tr|A0A075B6E2|A0A075B6E2_HUMAN40SribosomalproteinS19OS=HomosapiensOX=9606GN=RPS19PE=1SV=1;tr|M0QYF7|M0QYF7_HUMAN40SribosomalproteinS19(Fragment)OS=HomosapiensOX=9606GN=RPS19PE=1SV=1;tr|M0R140|M0R140_HUMAN40SribosomalproteinS19(…	27.731	0
sp|P13639|EF2_HUMANElongationfactor2OS=HomosapiensOX=9606GN=EEF2PE=1SV=4	27.664	0
sp|P55884|EIF3B_HUMANEukaryotictranslationinitiationfactor3subunitBOS=HomosapiensOX=9606GN=EIF3BPE=1SV=3;sp|P55884-2|EIF3B_HUMANIsoform2ofEukaryotictranslationinitiationfactor3subunitBOS=HomosapiensOX=9606GN=EIF3B;tr|C9JQN7|C9JQN7_HUMANEukaryotictranslationinitiationfactor3subunitB(Fragment)OS=HomosapiensOX=9606GN=EIF3BPE=1SV=1;tr|C9JZG1|C9JZG1_HUMANEukaryotictranslationinitiationfactor3subunitB(…	27.241	0
sp|P60174-1|TPIS_HUMANIsoform2ofTriosephosphateisomeraseOS=HomosapiensOX=9606GN=TPI1;sp|P60174|TPIS_HUMANTriosephosphateisomeraseOS=HomosapiensOX=9606GN=TPI1PE=1SV=3;tr|U3KPS5|U3KPS5_HUMANTriosephosphateisomerase(Fragment)OS=HomosapiensOX=9606GN=TPI1PE=1SV=8;tr|U3KQF3|U3KQF3_HUMANTriosephosphateisomerase(Fragment)OS=HomosapiensOX=9606GN=TPI1PE=1SV=1;tr|U3KPZ0|U3KPZ0_HUMANTriosephosphateisomerase(…	27.196	0
sp|P62854|RS26_HUMAN40SribosomalproteinS26OS=HomosapiensOX=9606GN=RPS26PE=1SV=3;sp|Q5JNZ5|RS26L_HUMANPutative40SribosomalproteinS26-like1OS=HomosapiensOX=9606GN=RPS26P11PE=5SV=1	26.224	0
sp|Q58FF8|H90B2_HUMANPutativeheatshockproteinHSP90-beta2OS=HomosapiensOX=9606GN=HSP90AB2PPE=1SV=2	25.762	0
sp|P62753|RS6_HUMAN40SribosomalproteinS6OS=HomosapiensOX=9606GN=RPS6PE=1SV=1;tr|A2A3R7|A2A3R7_HUMAN40SribosomalproteinS6OS=HomosapiensOX=9606GN=RPS6PE=1SV=1;tr|A2A3R5|A2A3R5_HUMAN40SribosomalproteinS6OS=HomosapiensOX=9606GN=RPS6PE=1SV=1	25.638	0
sp|Q6UWP8|SBSN_HUMANSuprabasinOS=HomosapiensOX=9606GN=SBSNPE=1SV=2	24.59	0
sp|Q2VIR3|IF2GL_HUMANEukaryotictranslationinitiationfactor2subunit3BOS=HomosapiensOX=9606GN=EIF2S3BPE=2SV=2;sp|P41091|IF2G_HUMANEukaryotictranslationinitiationfactor2subunit3OS=HomosapiensOX=9606GN=EIF2S3PE=1SV=3;sp|Q2VIR3-2|IF2GL_HUMANIsoform2ofEukaryotictranslationinitiationfactor2subunit3BOS=HomosapiensOX=9606GN=EIF2S3B	23.797	0
sp|Q8TAA3-2|PSMA8_HUMANIsoform2ofProteasomesubunitalpha-type8OS=HomosapiensOX=9606GN=PSMA8;sp|O14818|PSA7_HUMANProteasomesubunitalphatype-7OS=HomosapiensOX=9606GN=PSMA7PE=1SV=1;sp|Q8TAA3-5|PSMA8_HUMANIsoform3ofProteasomesubunitalpha-type8OS=HomosapiensOX=9606GN=PSMA8;sp|Q8TAA3|PSMA8_HUMANProteasomesubunitalpha-type8OS=HomosapiensOX=9606GN=PSMA8PE=2SV=3;tr|F5GY34|F5GY34_HUMANProteasomesubunitalpha…	20.129	0
sp|P17987|TCPA_HUMANT-complexprotein1subunitalphaOS=HomosapiensOX=9606GN=TCP1PE=1SV=1;tr|F5H282|F5H282_HUMANT-complexprotein1subunitalphaOS=HomosapiensOX=9606GN=TCP1PE=1SV=1;tr|E7EQR6|E7EQR6_HUMANT-complexprotein1subunitalphaOS=HomosapiensOX=9606GN=TCP1PE=1SV=1;tr|E7ERF2|E7ERF2_HUMANT-complexprotein1subunitalphaOS=HomosapiensOX=9606GN=TCP1PE=1SV=1;tr|F5H726|F5H726_HUMANT-complexprotein1subunitalp…	19.593	0
sp|P05089-3|ARGI1_HUMANIsoform3ofArginase-1OS=HomosapiensOX=9606GN=ARG1;sp|P05089|ARGI1_HUMANArginase-1OS=HomosapiensOX=9606GN=ARG1PE=1SV=2;sp|P05089-2|ARGI1_HUMANIsoform2ofArginase-1OS=HomosapiensOX=9606GN=ARG1;tr|A0A5F9ZH78|A0A5F9ZH78_HUMANArginase-1OS=HomosapiensOX=9606GN=ARG1PE=4SV=1;tr|A0A5F9ZGN6|A0A5F9ZGN6_HUMANArginase-1OS=HomosapiensOX=9606GN=ARG1PE=4SV=1	18.991	0
sp|Q08752|PPID_HUMANPeptidyl-prolylcis-transisomeraseDOS=HomosapiensOX=9606GN=PPIDPE=1SV=3	18.716	0
sp|Q15185-3|TEBP_HUMANIsoform3ofProstaglandinEsynthase3OS=HomosapiensOX=9606GN=PTGES3;sp|Q15185-4|TEBP_HUMANIsoform4ofProstaglandinEsynthase3OS=HomosapiensOX=9606GN=PTGES3;sp|Q15185|TEBP_HUMANProstaglandinEsynthase3OS=HomosapiensOX=9606GN=PTGES3PE=1SV=1;tr|A0A087WYT3|A0A087WYT3_HUMANProstaglandinEsynthase3OS=HomosapiensOX=9606GN=PTGES3PE=1SV=1	18.549	0
sp|P29508-2|SPB3_HUMANIsoform2ofSerpinB3OS=HomosapiensOX=9606GN=SERPINB3;sp|P29508|SPB3_HUMANSerpinB3OS=HomosapiensOX=9606GN=SERPINB3PE=1SV=2;sp|P48594|SPB4_HUMANSerpinB4OS=HomosapiensOX=9606GN=SERPINB4PE=1SV=2;tr|C9JZ65|C9JZ65_HUMANSerpinB4(Fragment)OS=HomosapiensOX=9606GN=SERPINB4PE=1SV=1;tr|H0Y5H9|H0Y5H9_HUMANSerpinB4(Fragment)OS=HomosapiensOX=9606GN=SERPINB4PE=1SV=1	17.759	0
sp|P27797|CALR_HUMANCalreticulinOS=HomosapiensOX=9606GN=CALRPE=1SV=1;tr|K7EJB9|K7EJB9_HUMANCalreticulin(Fragment)OS=HomosapiensOX=9606GN=CALRPE=1SV=1	16.412	0
sp|Q01105-3|SET_HUMANIsoform3ofProteinSETOS=HomosapiensOX=9606GN=SET;tr|A0A0C4DFV9|A0A0C4DFV9_HUMANProteinSETOS=HomosapiensOX=9606GN=SETPE=1SV=1;sp|Q01105-4|SET_HUMANIsoform4ofProteinSETOS=HomosapiensOX=9606GN=SET;sp|Q01105-2|SET_HUMANIsoform2ofProteinSETOS=HomosapiensOX=9606GN=SET;sp|Q01105|SET_HUMANProteinSETOS=HomosapiensOX=9606GN=SETPE=1SV=3;tr|A0A087X027|A0A087X027_HUMANProteinSETSIPOS=Homos…	16.251	0
sp|P12004|PCNA_HUMANProliferatingcellnuclearantigenOS=HomosapiensOX=9606GN=PCNAPE=1SV=1	15.442	0
sp|P26641|EF1G_HUMANElongationfactor1-gammaOS=HomosapiensOX=9606GN=EEF1GPE=1SV=3;sp|P26641-2|EF1G_HUMANIsoform2ofElongationfactor1-gammaOS=HomosapiensOX=9606GN=EEF1G	15.122	0
sp|P23526-2|SAHH_HUMANIsoform2ofAdenosylhomocysteinaseOS=HomosapiensOX=9606GN=AHCY;sp|P23526|SAHH_HUMANAdenosylhomocysteinaseOS=HomosapiensOX=9606GN=AHCYPE=1SV=4	14.724	0
sp|O75874|IDHC_HUMANIsocitratedehydrogenase[NADP]cytoplasmicOS=HomosapiensOX=9606GN=IDH1PE=1SV=2;tr|C9JJE5|C9JJE5_HUMANIsocitratedehydrogenase[NADP]cytoplasmic(Fragment)OS=HomosapiensOX=9606GN=IDH1PE=1SV=1;tr|C9JLU6|C9JLU6_HUMANIsocitratedehydrogenase[NADP]cytoplasmic(Fragment)OS=HomosapiensOX=9606GN=IDH1PE=1SV=8;tr|C9J4N6|C9J4N6_HUMANIsocitratedehydrogenase[NADP]cytoplasmic(Fragment)OS=Homosapie…	14.275	0
sp|Q99832-2|TCPH_HUMANIsoform2ofT-complexprotein1subunitetaOS=HomosapiensOX=9606GN=CCT7;sp|Q99832-4|TCPH_HUMANIsoform4ofT-complexprotein1subunitetaOS=HomosapiensOX=9606GN=CCT7;sp|Q99832-3|TCPH_HUMANIsoform3ofT-complexprotein1subunitetaOS=HomosapiensOX=9606GN=CCT7;sp|Q99832|TCPH_HUMANT-complexprotein1subunitetaOS=HomosapiensOX=9606GN=CCT7PE=1SV=2	14.091	0
sp|P78371-2|TCPB_HUMANIsoform2ofT-complexprotein1subunitbetaOS=HomosapiensOX=9606GN=CCT2;tr|F5GWF6|F5GWF6_HUMANT-complexprotein1subunitbetaOS=HomosapiensOX=9606GN=CCT2PE=1SV=2;sp|P78371|TCPB_HUMANT-complexprotein1subunitbetaOS=HomosapiensOX=9606GN=CCT2PE=1SV=4;tr|F8VQ14|F8VQ14_HUMANT-complexprotein1subunitbetaOS=HomosapiensOX=9606GN=CCT2PE=1SV=1	14.023	0
sp|P17066|HSP76_HUMANHeatshock70kDaprotein6OS=HomosapiensOX=9606GN=HSPA6PE=1SV=2;sp|P48741|HSP77_HUMANPutativeheatshock70kDaprotein7OS=HomosapiensOX=9606GN=HSPA7PE=5SV=2	13.477	0
sp|Q13200-2|PSMD2_HUMANIsoform2of26Sproteasomenon-ATPaseregulatorysubunit2OS=HomosapiensOX=9606GN=PSMD2;sp|Q13200-3|PSMD2_HUMANIsoform3of26Sproteasomenon-ATPaseregulatorysubunit2OS=HomosapiensOX=9606GN=PSMD2;sp|Q13200|PSMD2_HUMAN26Sproteasomenon-ATPaseregulatorysubunit2OS=HomosapiensOX=9606GN=PSMD2PE=1SV=3;tr|H7C1H2|H7C1H2_HUMAN26Sproteasomenon-ATPaseregulatorysubunit2(Fragment)OS=HomosapiensOX=9…	13.358	0
sp|O00299|CLIC1_HUMANChlorideintracellularchannelprotein1OS=HomosapiensOX=9606GN=CLIC1PE=1SV=4	13.2	0
sp|P62258-2|1433E_HUMANIsoformSVof14-3-3proteinepsilonOS=HomosapiensOX=9606GN=YWHAE;sp|P62258|1433E_HUMAN14-3-3proteinepsilonOS=HomosapiensOX=9606GN=YWHAEPE=1SV=1;tr|K7EM20|K7EM20_HUMAN14-3-3proteinepsilon(Fragment)OS=HomosapiensOX=9606GN=YWHAEPE=1SV=1	13.132	0
sp|P09382|LEG1_HUMANGalectin-1OS=HomosapiensOX=9606GN=LGALS1PE=1SV=2	12.958	0
sp|P14174|MIF_HUMANMacrophagemigrationinhibitoryfactorOS=HomosapiensOX=9606GN=MIFPE=1SV=4	12.946	0
sp|Q58FF6|H90B4_HUMANPutativeheatshockproteinHSP90-beta4OS=HomosapiensOX=9606GN=HSP90AB4PPE=5SV=1	12.798	0
sp|P25398|RS12_HUMAN40SribosomalproteinS12OS=HomosapiensOX=9606GN=RPS12PE=1SV=3	12.756	0
sp|O00303|EIF3F_HUMANEukaryotictranslationinitiationfactor3subunitFOS=HomosapiensOX=9606GN=EIF3FPE=1SV=1;tr|E9PQV8|E9PQV8_HUMANEukaryotictranslationinitiationfactor3subunitFOS=HomosapiensOX=9606GN=EIF3FPE=1SV=1;tr|A0A1W2PP79|A0A1W2PP79_HUMANEukaryotictranslationinitiationfactor3subunitFOS=HomosapiensOX=9606GN=EIF3FPE=1SV=1	12.643	0
sp|P10809|CH60_HUMAN60kDaheatshockprotein,mitochondrialOS=HomosapiensOX=9606GN=HSPD1PE=1SV=2	12.588	0
sp|P40926|MDHM_HUMANMalatedehydrogenase,mitochondrialOS=HomosapiensOX=9606GN=MDH2PE=1SV=3;tr|G3XAL0|G3XAL0_HUMANMalatedehydrogenaseOS=HomosapiensOX=9606GN=MDH2PE=1SV=1;sp|P40926-2|MDHM_HUMANIsoform2ofMalatedehydrogenase,mitochondrialOS=HomosapiensOX=9606GN=MDH2	12.158	0
sp|P62266|RS23_HUMAN40SribosomalproteinS23OS=HomosapiensOX=9606GN=RPS23PE=1SV=3;tr|D6RD47|D6RD47_HUMAN40SribosomalproteinS23OS=HomosapiensOX=9606GN=RPS23PE=1SV=1	12.069	0
sp|P13796|PLSL_HUMANPlastin-2OS=HomosapiensOX=9606GN=LCP1PE=1SV=6	11.931	0
sp|P25788-2|PSA3_HUMANIsoform2ofProteasomesubunitalphatype-3OS=HomosapiensOX=9606GN=PSMA3;sp|P25788|PSA3_HUMANProteasomesubunitalphatype-3OS=HomosapiensOX=9606GN=PSMA3PE=1SV=2;tr|G3V3W4|G3V3W4_HUMANProteasomesubunitalphatype-3OS=HomosapiensOX=9606GN=PSMA3PE=1SV=1;tr|G3V5N4|G3V5N4_HUMANProteasomesubunitalphatype-3OS=HomosapiensOX=9606GN=PSMA3PE=1SV=1;tr|G3V4X5|G3V4X5_HUMANProteasomeendopeptidaseco…	11.548	0
sp|P08708|RS17_HUMAN40SribosomalproteinS17OS=HomosapiensOX=9606GN=RPS17PE=1SV=2;tr|H0YN88|H0YN88_HUMAN40SribosomalproteinS17OS=HomosapiensOX=9606GN=RPS17PE=1SV=1;tr|A0A075B716|A0A075B716_HUMAN40SribosomalproteinS17OS=HomosapiensOX=9606GN=RPS17PE=1SV=1;tr|H3BNC9|H3BNC9_HUMANUncharacterizedproteinOS=HomosapiensOX=9606PE=3SV=2;tr|H0YN73|H0YN73_HUMAN40SribosomalproteinS17(Fragment)OS=HomosapiensOX=96…	11.252	0
sp|P61981|1433G_HUMAN14-3-3proteingammaOS=HomosapiensOX=9606GN=YWHAGPE=1SV=2	11.044	0
sp|O60506-5|HNRPQ_HUMANIsoform5ofHeterogeneousnuclearribonucleoproteinQOS=HomosapiensOX=9606GN=SYNCRIP;tr|B7Z645|B7Z645_HUMANHeterogeneousnuclearribonucleoproteinQOS=HomosapiensOX=9606GN=SYNCRIPPE=1SV=1;tr|B4DT28|B4DT28_HUMANHeterogeneousnuclearribonucleoproteinROS=HomosapiensOX=9606GN=HNRNPRPE=1SV=1;sp|O60506-4|HNRPQ_HUMANIsoform4ofHeterogeneousnuclearribonucleoproteinQOS=HomosapiensOX=9606GN=SY…	9.9882	0
sp|Q8NC51-4|PAIRB_HUMANIsoform4ofPlasminogenactivatorinhibitor1RNA-bindingproteinOS=HomosapiensOX=9606GN=SERBP1;sp|Q8NC51-3|PAIRB_HUMANIsoform3ofPlasminogenactivatorinhibitor1RNA-bindingproteinOS=HomosapiensOX=9606GN=SERBP1;sp|Q8NC51-2|PAIRB_HUMANIsoform2ofPlasminogenactivatorinhibitor1RNA-bindingproteinOS=HomosapiensOX=9606GN=SERBP1;sp|Q8NC51|PAIRB_HUMANPlasminogenactivatorinhibitor1RNA-bindingp…	9.5449	0
sp|P51991-2|ROA3_HUMANIsoform2ofHeterogeneousnuclearribonucleoproteinA3OS=HomosapiensOX=9606GN=HNRNPA3;sp|P51991|ROA3_HUMANHeterogeneousnuclearribonucleoproteinA3OS=HomosapiensOX=9606GN=HNRNPA3PE=1SV=2	9.3638	0
sp|Q6NVV1|R13P3_HUMANPutative60SribosomalproteinL13aproteinRPL13AP3OS=HomosapiensOX=9606GN=RPL13AP3PE=5SV=1;tr|Q8J015|Q8J015_HUMAN60SribosomalproteinL13aOS=HomosapiensOX=9606GN=RPL13APE=1SV=1;sp|P40429|RL13A_HUMAN60SribosomalproteinL13aOS=HomosapiensOX=9606GN=RPL13APE=1SV=2;tr|M0QYS1|M0QYS1_HUMAN60SribosomalproteinL13a(Fragment)OS=HomosapiensOX=9606GN=RPL13APE=1SV=2	9.0932	0
sp|Q9Y617-2|SERC_HUMANIsoform2ofPhosphoserineaminotransferaseOS=HomosapiensOX=9606GN=PSAT1;sp|Q9Y617|SERC_HUMANPhosphoserineaminotransferaseOS=HomosapiensOX=9606GN=PSAT1PE=1SV=2	9.0843	0
sp|P13929-3|ENOB_HUMANIsoform3ofBeta-enolaseOS=HomosapiensOX=9606GN=ENO3;sp|P13929-2|ENOB_HUMANIsoform2ofBeta-enolaseOS=HomosapiensOX=9606GN=ENO3;sp|P13929|ENOB_HUMANBeta-enolaseOS=HomosapiensOX=9606GN=ENO3PE=1SV=5	9.0816	0
sp|Q99613-2|EIF3C_HUMANIsoform2ofEukaryotictranslationinitiationfactor3subunitCOS=HomosapiensOX=9606GN=EIF3C;sp|Q99613|EIF3C_HUMANEukaryotictranslationinitiationfactor3subunitCOS=HomosapiensOX=9606GN=EIF3CPE=1SV=1;sp|B5ME19|EIFCL_HUMANEukaryotictranslationinitiationfactor3subunitC-likeproteinOS=HomosapiensOX=9606GN=EIF3CLPE=1SV=1	8.6489	0
sp|O15355|PPM1G_HUMANProteinphosphatase1GOS=HomosapiensOX=9606GN=PPM1GPE=1SV=1	8.5824	0
sp|Q71UI9-5|H2AV_HUMANIsoform5ofHistoneH2A.VOS=HomosapiensOX=9606GN=H2AFV;sp|Q71UI9-2|H2AV_HUMANIsoform2ofHistoneH2A.VOS=HomosapiensOX=9606GN=H2AFV;tr|C9J0D1|C9J0D1_HUMANHistoneH2AOS=HomosapiensOX=9606GN=H2AZ2PE=1SV=1;tr|A0A494C189|A0A494C189_HUMANHistoneH2AOS=HomosapiensOX=9606GN=H2AZ1PE=1SV=1;sp|Q99878|H2A1J_HUMANHistoneH2Atype1-JOS=HomosapiensOX=9606GN=H2AC14PE=1SV=3;sp|Q96KK5|H2A1H_HUMANHisto…	8.5762	0
sp|Q13347|EIF3I_HUMANEukaryotictranslationinitiationfactor3subunitIOS=HomosapiensOX=9606GN=EIF3IPE=1SV=1	8.1928	0
sp|O00410-2|IPO5_HUMANIsoform2ofImportin-5OS=HomosapiensOX=9606GN=IPO5;sp|O00410|IPO5_HUMANImportin-5OS=HomosapiensOX=9606GN=IPO5PE=1SV=4;tr|H0Y8C6|H0Y8C6_HUMANImportin-5(Fragment)OS=HomosapiensOX=9606GN=IPO5PE=1SV=1;sp|O00410-3|IPO5_HUMANIsoform3ofImportin-5OS=HomosapiensOX=9606GN=IPO5	7.7516	0
sp|O95373|IPO7_HUMANImportin-7OS=HomosapiensOX=9606GN=IPO7PE=1SV=1	7.3983	0
sp|P07737|PROF1_HUMANProfilin-1OS=HomosapiensOX=9606GN=PFN1PE=1SV=2;CON__P02584;tr|I3L3D5|I3L3D5_HUMANProfilin(Fragment)OS=HomosapiensOX=9606GN=PFN1PE=1SV=1	7.3658	0
sp|O60220|TIM8A_HUMANMitochondrialimportinnermembranetranslocasesubunitTim8AOS=HomosapiensOX=9606GN=TIMM8APE=1SV=1	7.0672	0
sp|Q04760-2|LGUL_HUMANIsoform2ofLactoylglutathionelyaseOS=HomosapiensOX=9606GN=GLO1;sp|Q04760|LGUL_HUMANLactoylglutathionelyaseOS=HomosapiensOX=9606GN=GLO1PE=1SV=4	6.9242	0
sp|Q9Y3U8|RL36_HUMAN60SribosomalproteinL36OS=HomosapiensOX=9606GN=RPL36PE=1SV=3	6.9019	0
sp|P28070|PSB4_HUMANProteasomesubunitbetatype-4OS=HomosapiensOX=9606GN=PSMB4PE=1SV=4	6.8456	0
sp|P36551|HEM6_HUMANOxygen-dependentcoproporphyrinogen-IIIoxidase,mitochondrialOS=HomosapiensOX=9606GN=CPOXPE=1SV=3	6.8073	0
sp|Q9Y230-2|RUVB2_HUMANIsoform2ofRuvB-like2OS=HomosapiensOX=9606GN=RUVBL2;sp|Q9Y230|RUVB2_HUMANRuvB-like2OS=HomosapiensOX=9606GN=RUVBL2PE=1SV=3	6.804	0
sp|P54577|SYYC_HUMANTyrosine--tRNAligase,cytoplasmicOS=HomosapiensOX=9606GN=YARSPE=1SV=4	6.8017	0
sp|P42574|CASP3_HUMANCaspase-3OS=HomosapiensOX=9606GN=CASP3PE=1SV=2	6.7412	0
sp|P00492|HPRT_HUMANHypoxanthine-guaninephosphoribosyltransferaseOS=HomosapiensOX=9606GN=HPRT1PE=1SV=2	6.6637	0
sp|Q9NSD9|SYFB_HUMANPhenylalanine--tRNAligasebetasubunitOS=HomosapiensOX=9606GN=FARSBPE=1SV=3	6.6622	0
sp|P26639|SYTC_HUMANThreonine--tRNAligase1,cytoplasmicOS=HomosapiensOX=9606GN=TARS1PE=1SV=3;sp|P26639-2|SYTC_HUMANIsoform2ofThreonine--tRNAligase1,cytoplasmicOS=HomosapiensOX=9606GN=TARS1	6.5322	0
sp|Q92973-3|TNPO1_HUMANIsoform3ofTransportin-1OS=HomosapiensOX=9606GN=TNPO1;sp|Q92973-2|TNPO1_HUMANIsoform2ofTransportin-1OS=HomosapiensOX=9606GN=TNPO1;sp|Q92973|TNPO1_HUMANTransportin-1OS=HomosapiensOX=9606GN=TNPO1PE=1SV=2	6.4196	0
sp|P46779-4|RL28_HUMANIsoform4of60SribosomalproteinL28OS=HomosapiensOX=9606GN=RPL28;sp|P46779-5|RL28_HUMANIsoform5of60SribosomalproteinL28OS=HomosapiensOX=9606GN=RPL28;tr|H0YLP6|H0YLP6_HUMAN60SribosomalproteinL28OS=HomosapiensOX=9606GN=RPL28PE=1SV=1;tr|H0YMF4|H0YMF4_HUMAN60SribosomalproteinL28OS=HomosapiensOX=9606GN=RPL28PE=1SV=1;sp|P46779|RL28_HUMAN60SribosomalproteinL28OS=HomosapiensOX=9606GN=R…	6.4075	0
sp|P53365-2|ARFP2_HUMANIsoform2ofArfaptin-2OS=HomosapiensOX=9606GN=ARFIP2;sp|P53365-3|ARFP2_HUMANIsoform3ofArfaptin-2OS=HomosapiensOX=9606GN=ARFIP2;sp|P53365|ARFP2_HUMANArfaptin-2OS=HomosapiensOX=9606GN=ARFIP2PE=1SV=1;tr|A0A087X1E4|A0A087X1E4_HUMANArfaptin-2OS=HomosapiensOX=9606GN=ARFIP2PE=1SV=1	6.2919	0
sp|P40227-2|TCPZ_HUMANIsoform2ofT-complexprotein1subunitzetaOS=HomosapiensOX=9606GN=CCT6A;sp|P40227|TCPZ_HUMANT-complexprotein1subunitzetaOS=HomosapiensOX=9606GN=CCT6APE=1SV=3	6.2451	0
sp|Q9C005|DPY30_HUMANProteindpy-30homologOS=HomosapiensOX=9606GN=DPY30PE=1SV=1	6.219	0
sp|Q16610-2|ECM1_HUMANIsoform2ofExtracellularmatrixprotein1OS=HomosapiensOX=9606GN=ECM1;sp|Q16610|ECM1_HUMANExtracellularmatrixprotein1OS=HomosapiensOX=9606GN=ECM1PE=1SV=2;sp|Q16610-4|ECM1_HUMANIsoform4ofExtracellularmatrixprotein1OS=HomosapiensOX=9606GN=ECM1	6.1931	0
sp|Q9NR30-2|DDX21_HUMANIsoform2ofNucleolarRNAhelicase2OS=HomosapiensOX=9606GN=DDX21;sp|Q9NR30|DDX21_HUMANNucleolarRNAhelicase2OS=HomosapiensOX=9606GN=DDX21PE=1SV=5	6.1584	0
sp|Q02878|RL6_HUMAN60SribosomalproteinL6OS=HomosapiensOX=9606GN=RPL6PE=1SV=3	6.1351	0
sp|O14980|XPO1_HUMANExportin-1OS=HomosapiensOX=9606GN=XPO1PE=1SV=1	6.1007	0
sp|Q8WYA6-3|CTBL1_HUMANIsoform3ofBeta-catenin-likeprotein1OS=HomosapiensOX=9606GN=CTNNBL1;sp|Q8WYA6-2|CTBL1_HUMANIsoform2ofBeta-catenin-likeprotein1OS=HomosapiensOX=9606GN=CTNNBL1;sp|Q8WYA6-4|CTBL1_HUMANIsoform4ofBeta-catenin-likeprotein1OS=HomosapiensOX=9606GN=CTNNBL1;sp|Q8WYA6|CTBL1_HUMANBeta-catenin-likeprotein1OS=HomosapiensOX=9606GN=CTNNBL1PE=1SV=1;tr|A0A087WUB9|A0A087WUB9_HUMANBeta-catenin-…	6.0894	0
sp|P31948-3|STIP1_HUMANIsoform3ofStress-induced-phosphoprotein1OS=HomosapiensOX=9606GN=STIP1;sp|P31948|STIP1_HUMANStress-induced-phosphoprotein1OS=HomosapiensOX=9606GN=STIP1PE=1SV=1;sp|P31948-2|STIP1_HUMANIsoform2ofStress-induced-phosphoprotein1OS=HomosapiensOX=9606GN=STIP1	6.0642	0
sp|P35579-2|MYH9_HUMANIsoform2ofMyosin-9OS=HomosapiensOX=9606GN=MYH9;sp|P35579|MYH9_HUMANMyosin-9OS=HomosapiensOX=9606GN=MYH9PE=1SV=4;sp|P35580|MYH10_HUMANMyosin-10OS=HomosapiensOX=9606GN=MYH10PE=1SV=3;sp|P35580-5|MYH10_HUMANIsoform5ofMyosin-10OS=HomosapiensOX=9606GN=MYH10;sp|P35580-2|MYH10_HUMANIsoform2ofMyosin-10OS=HomosapiensOX=9606GN=MYH10;sp|P35580-3|MYH10_HUMANIsoform3ofMyosin-10OS=Homosapi…	6.0482	0
sp|P54819-4|KAD2_HUMANIsoform4ofAdenylatekinase2,mitochondrialOS=HomosapiensOX=9606GN=AK2;tr|G3V213|G3V213_HUMANAdenylatekinase2,isoformCRA_aOS=HomosapiensOX=9606GN=AK2PE=1SV=1;tr|F8VZG5|F8VZG5_HUMANAdenylatekinase2,mitochondrialOS=HomosapiensOX=9606GN=AK2PE=1SV=1;tr|A0A5F9ZHP2|A0A5F9ZHP2_HUMANAdenylatekinase2,mitochondrialOS=HomosapiensOX=9606GN=AK2PE=4SV=1;sp|P54819-6|KAD2_HUMANIsoform6ofAdenyl…	6.0465	0
sp|P30086|PEBP1_HUMANPhosphatidylethanolamine-bindingprotein1OS=HomosapiensOX=9606GN=PEBP1PE=1SV=3	6.0415	0
sp|Q8TDN6|BRX1_HUMANRibosomebiogenesisproteinBRX1homologOS=HomosapiensOX=9606GN=BRIX1PE=1SV=2	6.0017	0
sp|O00469-3|PLOD2_HUMANIsoform3ofProcollagen-lysine,2-oxoglutarate5-dioxygenase2OS=HomosapiensOX=9606GN=PLOD2	5.9772	0
sp|Q08211|DHX9_HUMANATP-dependentRNAhelicaseAOS=HomosapiensOX=9606GN=DHX9PE=1SV=4	5.8432	0
sp|P42766|RL35_HUMAN60SribosomalproteinL35OS=HomosapiensOX=9606GN=RPL35PE=1SV=2	5.8007	0
sp|P11362-18|FGFR1_HUMANIsoform18ofFibroblastgrowthfactorreceptor1OS=HomosapiensOX=9606GN=FGFR1;sp|P11362-16|FGFR1_HUMANIsoform17ofFibroblastgrowthfactorreceptor1OS=HomosapiensOX=9606GN=FGFR1	5.752	0
sp|Q9BVA1|TBB2B_HUMANTubulinbeta-2BchainOS=HomosapiensOX=9606GN=TUBB2BPE=1SV=1;sp|Q13885|TBB2A_HUMANTubulinbeta-2AchainOS=HomosapiensOX=9606GN=TUBB2APE=1SV=1	5.7456	0
sp|P62750|RL23A_HUMAN60SribosomalproteinL23aOS=HomosapiensOX=9606GN=RPL23APE=1SV=1;tr|H7BY10|H7BY10_HUMAN60SribosomalproteinL23a(Fragment)OS=HomosapiensOX=9606GN=RPL23APE=1SV=1;tr|K7EJV9|K7EJV9_HUMAN60SribosomalproteinL23a(Fragment)OS=HomosapiensOX=9606GN=RPL23APE=1SV=1;tr|K7ERT8|K7ERT8_HUMAN60SribosomalproteinL23a(Fragment)OS=HomosapiensOX=9606GN=RPL23APE=1SV=1;tr|A8MUS3|A8MUS3_HUMAN60Sribosomal…	5.7449	0
sp|Q9Y2K3|MYH15_HUMANMyosin-15OS=HomosapiensOX=9606GN=MYH15PE=1SV=5	5.7255	0
sp|P62906|RL10A_HUMAN60SribosomalproteinL10aOS=HomosapiensOX=9606GN=RPL10APE=1SV=2	5.7194	0
sp|O75643-2|U520_HUMANIsoform2ofU5smallnuclearribonucleoprotein200kDahelicaseOS=HomosapiensOX=9606GN=SNRNP200;tr|A0A494C1A5|A0A494C1A5_HUMANU5smallnuclearribonucleoprotein200kDahelicase(Fragment)OS=HomosapiensOX=9606GN=SNRNP200PE=1SV=1;sp|O75643|U520_HUMANU5smallnuclearribonucleoprotein200kDahelicaseOS=HomosapiensOX=9606GN=SNRNP200PE=1SV=2	5.6982	0
sp|P35251-2|RFC1_HUMANIsoform2ofReplicationfactorCsubunit1OS=HomosapiensOX=9606GN=RFC1;sp|P35251|RFC1_HUMANReplicationfactorCsubunit1OS=HomosapiensOX=9606GN=RFC1PE=1SV=4	5.6952	0
sp|P28066-2|PSA5_HUMANIsoform2ofProteasomesubunitalphatype-5OS=HomosapiensOX=9606GN=PSMA5;sp|P28066|PSA5_HUMANProteasomesubunitalphatype-5OS=HomosapiensOX=9606GN=PSMA5PE=1SV=3	5.6947	0
sp|Q9NXP7-2|GIN1_HUMANIsoform2ofGypsyretrotransposonintegrase-likeprotein1OS=HomosapiensOX=9606GN=GIN1;sp|Q9NXP7-3|GIN1_HUMANIsoform3ofGypsyretrotransposonintegrase-likeprotein1OS=HomosapiensOX=9606GN=GIN1;sp|Q9NXP7|GIN1_HUMANGypsyretrotransposonintegrase-likeprotein1OS=HomosapiensOX=9606GN=GIN1PE=1SV=3	5.6198	0
sp|Q7L3T8|SYPM_HUMANProbableproline--tRNAligase,mitochondrialOS=HomosapiensOX=9606GN=PARS2PE=1SV=1	5.5985	0
sp|P17174-2|AATC_HUMANIsoform2ofAspartateaminotransferase,cytoplasmicOS=HomosapiensOX=9606GN=GOT1;sp|P17174|AATC_HUMANAspartateaminotransferase,cytoplasmicOS=HomosapiensOX=9606GN=GOT1PE=1SV=3	5.5936	0
sp|P20073-2|ANXA7_HUMANIsoform2ofAnnexinA7OS=HomosapiensOX=9606GN=ANXA7;sp|P20073|ANXA7_HUMANAnnexinA7OS=HomosapiensOX=9606GN=ANXA7PE=1SV=3	5.567	0
